# Supplementary material for: Cucumber mosaic virus coat protein induces the development of chlorotic symptoms through interacting with the chloroplast ferredoxin I protein
Source: PubMed Central journal article supplement (PMC5775247; doi:10.1038/s41598-018-19525-5), 2018-01-19

***Cucumber mosaic virus* coat protein induces the development of chlorotic symptoms through interacting with the chloroplast ferredoxin I protein**

Yanhong Qiu<sup>1</sup>, Yongjiang Zhang<sup>1</sup>, Chaonan Wang<sup>1, 2</sup>, Rong Lei<sup>1</sup>, Yupin Wu<sup>\*1</sup>, Xinshi Li<sup>\*1</sup> & Shuifang Zhu<sup>\*1</sup>

<sup>1</sup>Chinese Academy of Inspection and Quarantine, Beijing 100176, China. <sup>2</sup>China Agricultural University, Beijing 100129, China. Correspondence and requests for materials should be addressed to Y.P.W (email: wu yuping@caiqtest.com) or X.S.L (email: lixinshi2017@126.com) or S.F.Z. (email: [zhusf@caiq.gov.cn](mailto:zhusf@caiq.gov.cn)).

**Supplementary materials**

Supplementary Table

**Table S1 Details regarding the primers used in this study.**

Supplementary Figure

**Figure S1** The subcellular localization of CMV CP. GFP fused to CP mainly localized in cytoplasm when *Agrobacterium*- infiltrated into *Nicotiana benthamiana* plants. Scale bars = 25  $\mu$ m.

**Table S1 Details regarding the primers used in this study.**

| Primer      | Sequences                                         | Restriction Enzyme           |
|-------------|---------------------------------------------------|------------------------------|
| M-5UTR-F    | <u>GGATCCT</u> AATACGACTCACTATAGGTAATCTTACCACTGTG | <i>Bam</i> HI/ <i>Pst</i> I  |
| M-5UTR-R    | ATTTGTCCATGACTCGACTCAATTC                         |                              |
| QCP-F       | ATTGAGTCGAGTCATGGACAAATCTGG                       |                              |
| QCP-R       | CTGGAACACGGAACTAAGTCGGG                           |                              |
| M-3UTR-F    | TGAGTCGAGTCATGGACAAATCTGG                         |                              |
| M-3UTR-R    | <u>CTGCAGT</u> GGTCTCCTTTTAGAG                    |                              |
| Q-5UTR-F    | <u>CTGCAGT</u> AATACGACTCACTATAGGGTAATCTTACCAC    | <i>Pst</i> I/ <i>Bam</i> HI  |
| Q-5UTR-R    | GATTTGTCCATAGGCACACTGAGAC                         |                              |
| MCP-F       | GTCTCAGTGTGCCTATGGACAAATC                         |                              |
| MCP-R       | AACACACGGATCAGACTGGGAGC                           |                              |
| Q-3UTR-F    | GTGCTCCCAGTCTGATCCGTGTGTTACCGG                    |                              |
| Q-3UTR-R    | AAC <u>GGATCC</u> TGGTCTCCTTATGGAGAACCTGTGG       |                              |
| BD-MCP-F    | <u>CGGATCC</u> GTATGGACAAATCTGAATC                | <i>Bam</i> HI/ <i>Pst</i> I  |
| BD-MCP-R    | <u>ACTGCAG</u> ATCAGACTGGGAGCACTC                 |                              |
| AD-FdI-F    | AA <u>AGAATTC</u> ATGGCCAGTATTTTCAGGTAC           | <i>Eco</i> RI/ <i>Bam</i> HI |
| AD-FdI-R    | AG <u>GGATCCT</u> TAGCCAGTGAGCTCC                 |                              |
| AD-FdI-55R  | AA <u>AGGATCC</u> TAAATAAGCTTCACTTTGTAAGT         |                              |
| AD-FdI-56F  | AG <u>GAATTC</u> ATGACACCAGAGGGAACAGTTGAG         |                              |
| Bi-MCP-F    | AAC <u>GGATCC</u> ATGGACAAATCTGAATC               | <i>Bam</i> HI/ <i>Kpn</i> I  |
| Bi-MCP-R    | AA <u>AGGTACC</u> TCAGACTGGGAGCACTCTAG            |                              |
| Bi-QCP-F    | AA <u>AGGATCC</u> ATGGACAAATCTGGATCTCC            | <i>Bam</i> HI/ <i>Kpn</i> I  |
| Bi-QCP-R    | AA <u>AGGTACC</u> AGTCGGGAGCATCCGTGAG             |                              |
| Bi-FdI-F    | AAC <u>GGATCC</u> ATGGCCAGTATTTTCAGG              | <i>Bam</i> HI/ <i>Xho</i> I  |
| Bi-FdI-R    | AA <u>ACTCG</u> AGGCCAGTGAGCTCCTCC                |                              |
| Sub-FdI-F   | AA <u>CTGCAG</u> ATGGCCAGTATTTTCAGG               | <i>Pst</i> I/ <i>Sal</i> I   |
| Sub-FdI-55R | AA <u>AGTCG</u> ACAAATAAGCTTCACTTTGTAAGT          |                              |
| Sub-FdI-R   | AG <u>TCGAC</u> ATGCCAGTGAGCTCCTC                 |                              |
| Sub-CP-F    | AA <u>CTGCAG</u> ATGGACAAATCTGAATC                | <i>Pst</i> I/ <i>Spe</i> I   |
| Sub-CP-R    | AA <u>ACTAGT</u> GACTGGGAGCACTCTAG                |                              |
| TRV-FdI-F   | A <u>AGAATTC</u> CCTGAAAGCCATAACC                 | <i>Eco</i> RI/               |
| TRV-FdI-R   | A <u>AGGATCC</u> CAGACTGTGGGTAAGC                 | <i>Bam</i> HI                |

**Figure S1**

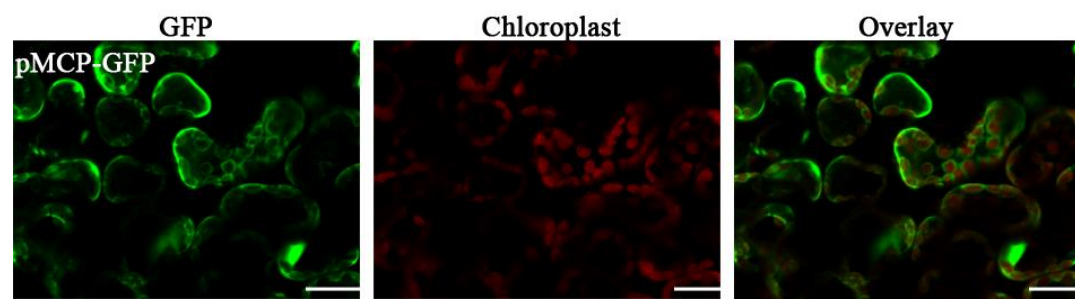

Supplement: 41598_2018_19525_MOESM1_ESM.pdf [file 41598_2018_19525_MOESM1_ESM.pdf]
